# Supplementary material for: Flame retardancy effects between expandable graphite and halloysite nanotubes in silicone rubber foam
Source: Royal Society of Chemistry journal article supplement (doi:10.1039/d1ra01409a), 2021-01-01
Supplement: d1ra01409a1.pdf [file d1ra01409a1.pdf]

Supplementary Information

Table 1 parameters of EG flame retardant silicone rubber foam

| Sample      | TTI (s) | pkHRR (KW/m <sup>2</sup> ) | THR (MJ/m <sup>2</sup> ) |
|-------------|---------|----------------------------|--------------------------|
| SiF-EG0%    | 24.2    | 30                         | 69.19                    |
| SiF-EG2.5%  | 28.2    | 81                         | 70.48                    |
| SiF-EG5%    | 30.2    | 109                        | 70.97                    |
| SiF-EG7.5%  | 32.6    | 177                        | 73.89                    |
| SiF-EG10%   | 35.0    | 145                        | 63.92                    |
| SiF-EG12.5% | 36      | 202                        | 64.64                    |
| SiF-EG15%   | 36.3    | 39                         | 50.75                    |
| SiF-EG17.5% | 36.3    | 47                         | 50.04                    |
| SiF-EG20%   | 37.4    | 37                         | 49.46                    |

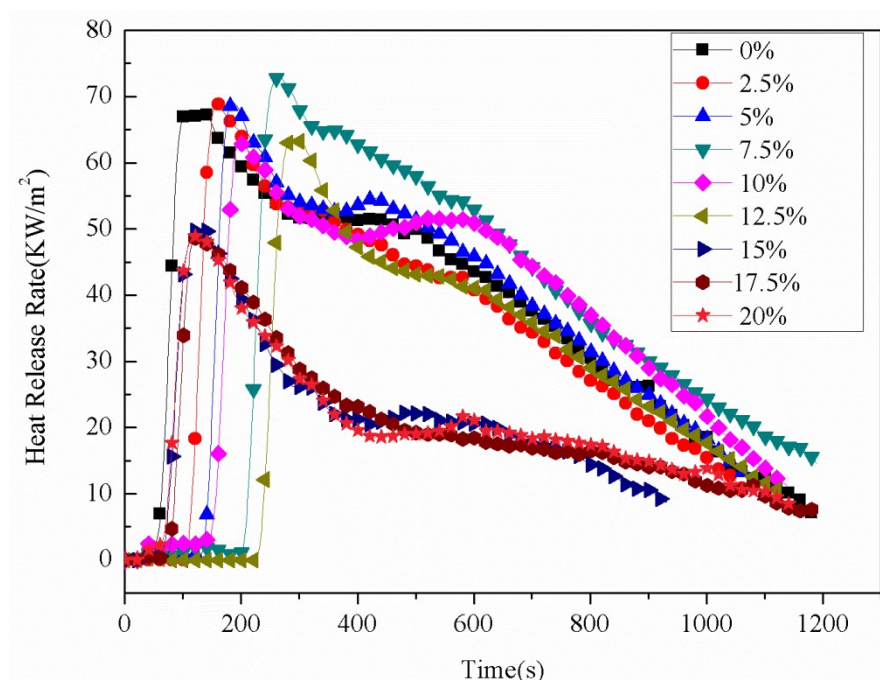

Figure 1. Heat release rate curves of SiF with different amount of EG added at a flux of 35 kW/m<sup>2</sup>.

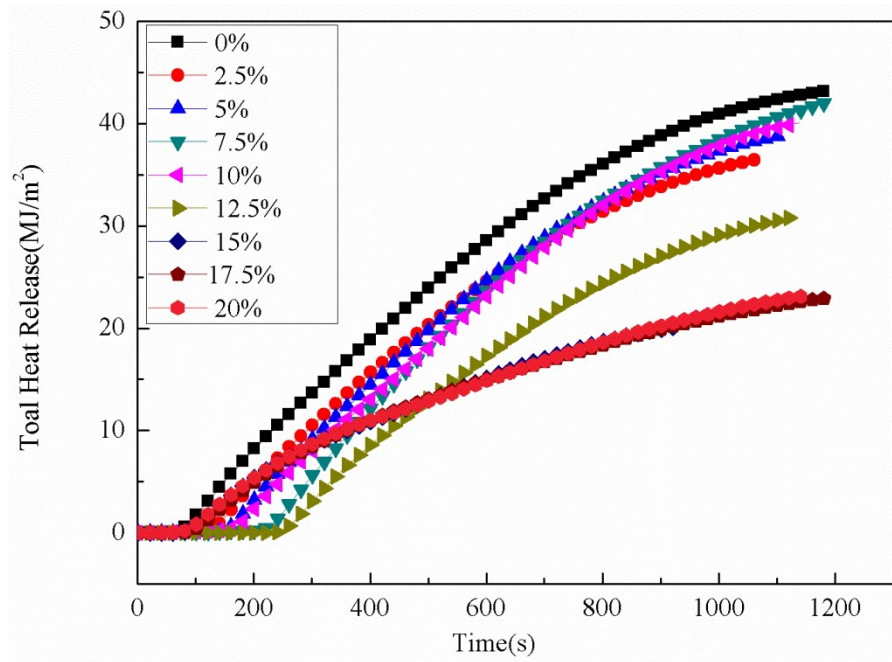

**Figure 2.** Total heat release rate curves of SiF with different amount of EG added at a flux of 35 kW/m<sup>2</sup>
